## **Effect of a simple exercise programme on hospitalisation-associated disability in older patients: a randomised controlled trial.**

**Authors:** Javier Ortiz-Alonso<sup>1,2,3\*</sup>, Natalia Bustamante-Ara<sup>4\*</sup>, Pedro L. Valenzuela<sup>5\*</sup>, María T. Vidán<sup>1,2,3,6</sup>, Gabriel Rodríguez-Romo<sup>3,7</sup>, Jennifer Mayordomo-Cava<sup>2,3</sup>, Marianna Javier-González<sup>1</sup>, Mercedes Hidalgo-Gamarra<sup>1</sup>, Myriel López-Tatis<sup>1</sup>, María Isabel Valades-Malagón<sup>1</sup>, Alejandro Santos-Lozano<sup>8,9</sup>, Alejandro Lucia<sup>3,9,10</sup>, José Antonio Serra-Rexach<sup>1,2,3,6</sup>

\* These authors contributed equally

### **Affiliations:**

<sup>1</sup> Geriatric Department, Hospital General Universitario Gregorio Marañón, Madrid, Spain.

<sup>2</sup> Instituto de Investigación Sanitaria Gregorio Marañón, Madrid, Spain.

<sup>3</sup> Biomedical Research Networking Centre on Frailty and Healthy Ageing, CIBERFES, Madrid, Spain.

<sup>4</sup> Universidad Autónoma de Chile, Talca, Chile.

<sup>5</sup> Systems Biology Department, University of Alcalá, Madrid, Spain.

<sup>6</sup> School of Medicine, Universidad Complutense, Madrid, Spain.

<sup>7</sup> Sports Department, Instituto Nacional de Educación Física, Universidad Politécnica, Madrid, Spain.

<sup>8</sup> i+HeALTH, European University Miguel de Cervantes, Valladolid, Spain.

<sup>9</sup> Research Institute Hospital 12 de Octubre ('i+12'), Madrid, Spain.

<sup>10</sup> Faculty of Sport Sciences, Universidad Europea de Madrid, Madrid, Spain.

**Correspondence to:** Javier Ortiz Alonso, MD.

Geriatric Service, Hospital General Universitario Gregorio  
Marañón.

Calle Doctor Esquerdo, no.46, Madrid 28007, Spain.

Email: [javier.ortiz@salud.madrid.org](mailto:javier.ortiz@salud.madrid.org)

**Running title:** Simple exercises against hospitalisation-associated disability.

**Key words:** Activities of daily living; functional decline; physical activity; geriatric assessment; hospitalisation; intervention.

**Abstract word count:** 287

**Main text word count:** 2427

**References:** 24

**Figures and Tables:** 2 Figure and 2 Tables

**Funding information:** This study was supported by the Instituto de Salud Carlos III (Ministerio de Ciencia, Innovación y Universidades, Spain) (RD12/0043/0025, PI12/02852, PI15/00558 and PI18/00139); Biomedical Research Networking Center on Frailty and Healthy Aging (CIBERFES, Spain); and FEDER funds from the European Union. The work of Pedro L. Valenzuela is supported by a contract granted by the University of Alcalá (FPI2016).

**Acknowledgements:** We sincerely thank the geriatrics ward team for their valuable help and contribution to our results, with a special mention to the following professionals: Alison Martínez, Jaqueline Ferrero, Mar Alonso, Laura Arribas, Laura Osuna, Reyes Vaquerizo, Cristina Cebollero, Yolanda Navarro, Soledad Rubio, Ana Ruiz, Saray Martínez, Raquel Moreno, María Angeles Flores, Lidia del Campo, Azucena Ríos, Antonio Piñeiro, Manuela Gámez, Piedad Trujillo, Mayte Mesa, Raquel Gutiérrez, Ana

M<sup>a</sup> García, M<sup>a</sup> Jesús Ruiz, Susana Palacios, Marta Orea, Ana Belén Huguet, Laura Jaro, Susana Robledo, José Lázaro.

**Authors' contributions:** Ortiz-Alonso, Bustamante-Ara, Vidán-Astiz, Rodriguez-Romo, Lucia and Serra-Rexach designed the work, acquired the data, and drafted the initial version of the manuscript. Valenzuela and Lucia analysed the data and drafted the final manuscript. Mayordomo-Cava, Javier-Gonzalez, Hidalgo-Gamarra, López-Tatis and Valades-Malagón contributed to the acquisition of data and revised the manuscript critically for important intellectual content. Santos-Lozano contributed to data analysis and revised the manuscript critically for important intellectual content. All the authors gave final approval of the final version and agree to be accountable for all aspects of the work in ensuring that questions related to the accuracy or integrity of any part of the work are appropriately investigated and resolved.

**Brief summary:** A simple inpatient intervention consisting of walking and rising from a chair (~20 minutes/day) considerably decreases the risk of hospitalisation-associated disability in acutely hospitalised older patients.

1 **ABSTRACT**

2 *Objective:* Hospitalisation-associated disability (HAD, defined as the loss of ability to  
3 perform one or more basic activities of daily living [ADL] independently at discharge) is  
4 a frequent condition among older patients. The present study aimed to assess whether a  
5 simple inpatient exercise programme decreases the incidence of HAD in acutely  
6 hospitalised very old patients.

7 *Design:* In this randomized controlled trial (Activity in GERiatric acute CARE, AGE CAR)  
8 participants were assigned to a control or intervention (exercise) group, and were assessed  
9 at baseline, admission, discharge, and 3 months thereafter.

10 *Setting and participants:* 268 patients (mean age 88 years, range 75–102) admitted to an  
11 acute care for elders (ACE) unit of a Public Hospital were randomized to a control  
12 (n=125) or intervention (exercise) group (n=143).

13 *Methods:* Both groups received usual care, and patients in the intervention group also  
14 performed simple supervised exercises (walking and rising from a chair, for a total daily  
15 duration of ~20 min). We measured incident HAD at discharge and after 3 months  
16 (primary outcome); and Short Physical Performance Battery (SPPB), ambulatory  
17 capacity, number of falls, re-hospitalisation and death during a 3-month follow-up  
18 (secondary outcomes).

19 *Results:* Median duration of hospitalisation was 7 days (interquartile range 4 days).  
20 Compared with admission, the intervention group had a lower risk of HAD at discharge  
21 (odds ratio [OR]: 0.32; 95% confidence interval [CI]: 0.11–0.92) and at 3-months follow-  
22 up (OR 0.24; 95% CI: 0.08–0.74) than controls during follow-up. No intervention effect  
23 was noted for the other secondary endpoints (all  $p > 0.05$ ), although a trend towards a lower  
24 mortality risk was observed in the intervention group ( $p = 0.078$ ).

25 *Conclusion and implications:* These findings demonstrate that a simple inpatient exercise  
26 programme significantly decreases the risk of HAD in acutely hospitalised, very old  
27 patients.

28 **Trial registration:** NCT0137489 (<https://clinicaltrials.gov/ct2/show/NCT01374893>).

29

## 30 INTRODUCTION

31 Hospitalisation-associated disability (HAD, *i.e.*, loss of the ability to perform one or more  
32 basic activities of daily living [ADL] independently at discharge) occurs in more than  
33 one-third of hospitalised older adults.<sup>1-4</sup> This condition is associated with long-term  
34 disability, institutionalisation and death,<sup>5-7</sup> and therefore its prevention should be a  
35 priority.

36 Hospitalised older patients spend most of the time in bed even if they are able to walk  
37 independently,<sup>8</sup> and the majority (73%) do not walk at all during hospitalisation.<sup>9</sup> Several  
38 physical strategies can be applied to prevent the functional decline associated with periods  
39 of restricted mobility such as those imposed by hospitalisation, but physical exercise  
40 appears the most effective.<sup>10</sup> Exercise interventions have proven feasible and safe in  
41 acutely hospitalised older medical patients, and are effective to improve their functional  
42 status at discharge as well as to reduce the length and cost of hospital stays.<sup>11-13</sup> It has  
43 been recommended that hospitalised old people should perform multicomponent exercise  
44 programmes, that is, combining walking and resistance exercises.<sup>11</sup> However, this type of  
45 intervention usually involves complex exercises and requires the purchase of weight-  
46 training equipment, which might hinder its routine implementation in some Acute Care  
47 of Elderly (ACE) units.

48 The aim of this study was to determine the effects of an inpatient exercise programme  
49 including simple physical exercises for patients admitted to an ACE unit on: incident  
50 HAD at discharge and at 3-months post-discharge (*primary endpoint*); and performance  
51 on the Short Physical Performance Battery (SPPB), independent-walking ability  
52 (functional ambulatory classification [FAC]), and number of falls, re-hospitalisation and  
53 mortality risk during the 3 months following discharge (*secondary endpoints*).

## 54 **METHODS**

### 55 **Study design**

56 This clinical trial (NCT01374893) complied with the recommendations of the  
57 Consolidated Standards of Reporting Trials (CONSORT) statement.<sup>14</sup> Patients (>75  
58 years) admitted to our ACE unit (*Hospital General Universitario Gregorio Marañón*,  
59 Madrid) from June 2012 to June 2014 were considered eligible to participate in the study.  
60 During these two years, the patients were eligible to be included in the control or  
61 intervention group in a time-dependent manner (i.e., using 4- or 8-week blocks), to avoid  
62 the co-presence of patients from both groups in the unit, such that the patients were  
63 blinded to actual group assignment. We then excluded those who were non-ambulatory  
64 or dependent in all basic ADL at baseline (i.e., 2 weeks before admission, assessed by  
65 retrospective interview), had unstable cardiovascular disease or any other major medical  
66 condition contraindicating exercise, terminal illness, severe dementia, an expected length  
67 of hospitalisation <3 days, were transferred from another hospital unit, or had a scheduled  
68 admission (which was usually associated with a length of hospitalisation <3 days). Only  
69 those hospitalised for 3 or more days and alive at discharge were included. The  
70 Institutional Review Board approved the protocol, and written informed consent was  
71 obtained from patients. When it was not possible to obtain the informed consent directly  
72 from a patient due to medical reasons (e.g., impaired cognitive function), proxy consent  
73 was obtained from their relatives. All procedures were performed in accordance with the  
74 ethical standards laid down in the 1964 Declaration of Helsinki and its later amendments.  
75 Both groups received standard care in our ACE unit.<sup>15</sup>

### 76 **Intervention**

77 The intervention (Monday to Friday) consisted solely of rising from a seated to an upright

78 position (using armrests/assistance if necessary) and supervised walking exercises (a  
79 representative example of the exercises performed is available as **Supplementary**  
80 **Material**). For the former, exercise loads increased individually and progressively from  
81 1 to 3 sets of up to 10 repetitions, with a 2-minute rest between sets. When patients could  
82 complete the prescribed training session (e.g., 1 set of 10 repetitions) in two consecutive  
83 days, a new set was added, up to a maximum of 3 sets of 10 repetitions per session.  
84 Walking total time progressed from 3 to 10 minutes (with resting periods if needed,  
85 depending on the patient's condition) along the corridor of the ward with/without  
86 assistance. Standing and walking exercises were separated by a rest period of up to 5  
87 minutes. All the exercise sessions were supervised by a fitness specialist (NBA or GRR),  
88 and training loads were recorded in a notebook.

## 89 **Endpoints**

90 The research staff included nurses, medical residents and the aforementioned fitness  
91 specialists who were in charge of supervising each session. Those involved in outcome  
92 assessment were not involved in supervising the intervention. However, assessors and  
93 care providers were not blinded to the assigned intervention. The ability to perform basic  
94 ADL, the SPPB,<sup>16</sup> and the modified FAC<sup>17</sup> were assessed in-hospital on admission and  
95 on discharge. Basic ADLs and FAC were also assessed retrospectively to analyse baseline  
96 status, as well as by telephone interview 3-months post-discharge. HAD was considered  
97 as a dichotomous variable attending to whether the patient had lost or not the ability to  
98 perform one or more ADL independently, and was assessed at discharge and 3 months  
99 later.<sup>1</sup> The basic ADL included for HAD assessment were bathing, dressing, toileting,  
100 transferring, continence and eating.<sup>18</sup> We also assessed the loss of independent ambulation  
101 at discharge and three months later. This was determined according to the modified FAC,  
102 which classifies patients in five different categories attending to their level of dependence



103 during walking: a score of 0 was assigned if the patient could not walk, 1 if the patient  
104 required continuous manual contact to support the body, 2 for light or intermittent manual  
105 contact to assist balance, 3 for independent but supervised ambulation, and 4 for  
106 independent ambulation on level surfaces or stairs.<sup>17</sup> Thus, a FAC score <4 was  
107 considered the threshold for independent ambulation.<sup>17</sup> Mortality and number of falls  
108 during post-discharge follow-up were recorded by telephone interview.

109 Although the original protocol specified a change in SPPB score as the primary  
110 endpoint,<sup>14</sup> an interim analysis after 4 months revealed that 94% (intervention) and 84%  
111 (controls) of patients had an SPPB score <6 on a 0–12 scale, masking a potential  
112 intervention effect. Accordingly, we considered that the intervention effects would not be  
113 noticeable in a test such as the SPPB given the very low physical performance capacity  
114 of the study participants, whereas ability to perform basic ADL might be more responsive  
115 to the intervention in this patient group. Thus, HAD was established as the primary  
116 endpoint.

### 117 **Statistical analysis**

118 Prior (unpublished) data obtained in 604 patients showed that 33% of the patients  
119 admitted to our ACE unit improved in one or more ADL from admission to discharge. As  
120 we hoped to increase this rate by 15% with the intervention (up to 48%), we estimated a  
121 sample of 260 or more patients to detect a significant intervention effect on incident HAD  
122 (power=80%,  $\alpha=0.05$ ).

123 Data are presented as mean±standard deviation (SD). Normal distribution (Shapiro-Wilk  
124 test) and homoscedasticity (Levene's test) of the data were checked before any statistical  
125 treatment. Groups were compared using Student's independent or chi-square tests for  
126 continuous or dichotomous variables, respectively. Binary logistic regression was used to

127 compare the risk of HAD, frailty (SPPB score <9), independent ambulation, re-  
128 hospitalisation and death between groups. Survival analysis (crude and adjusted Kaplan-  
129 Meier) was performed during the 3-month follow-up. Incidence rate ratio (IRR,  
130 calculated with negative binomial regression) was used to compare the number of falls  
131 between groups. We did not impute missing data, and thus only available data was used  
132 for analysis for each specific variable. All statistical analyses were conducted using a  
133 statistical software package (SPSS 23.0, IBM, NY) with  $\alpha=0.05$ .

## 134 **RESULTS**

135 A flow diagram of study participants is shown in **figure 1**. From a total of 1110 patients  
136 admitted to our ACE unit during the study period, 281 met all inclusion criteria and  
137 volunteered to participate. Of these, 131 and 150 were assigned to the control and the  
138 intervention group, respectively. Finally, 268 patients (n=143 and 125 for intervention  
139 and control, respectively) completed the study and could be included in the analysis. No  
140 between-group differences were found at the start of the study for most  
141 sociodemographic/clinical variables, but those in the intervention arm were overall more  
142 dependent in ADL function, both at baseline (i.e., 2 weeks before admission, assessed by  
143 retrospective interview) and admission (**Table 1**). The median length of hospitalisation  
144 was 7 days (interquartile range [IQR] 4), with no between-group differences (p=0.246).  
145 Median duration of the exercise intervention was 3 days (IQR 2), with an average total  
146 exercise time per day of ~20 min (the median duration of the walking part was 5 min  
147 [IQR 4, range 0 to 10] and patients performed a mean of 9 [SD 6, range 0 to 30] sit to  
148 stands). No adverse effects or falls were recorded during the intervention. Five (3.5%)  
149 patients did not exercise because they had a rapid, severe functional decline shortly after  
150 admission.

151 Compared with admission, patients in the exercise group had a significantly lower risk of  
152 HAD than their controls both at discharge and at 3-months post-discharge, even when  
153 adjusting for clinical characteristics and functional performance at admission (**Table 2**),  
154 with the proportion of patients diagnosed with HAD significantly lower in the former at  
155 both time points ( $p=0.012$  and  $0.003$  for discharge and 3-month post-discharge,  
156 respectively). Compared with baseline, however, the proportion of patients with HAD did  
157 not differ between groups at discharge (56% and 58% for the intervention and control  
158 group, respectively;  $p=0.685$ ) or 3 months later (53% and 62%, respectively;  $p=0.188$ ).  
159 Also, no intervention effect was noted at discharge for the SPPB ( $3.6\pm 2.5$  and  $4.2\pm 3.1$  for  
160 the intervention and control group, respectively;  $p=0.108$ ) and FAC score ( $2.8\pm 1.2$  and  
161  $2.9\pm 1.3$ , respectively;  $p=0.404$ ), or for risk of re-hospitalisation or number of falls during  
162 the 3-month follow-up ( $0.44\pm 1.47$  [median: 0, range: 0, 10] and  $0.70\pm 1.70$  [median: 0,  
163 range: 0, 10]) (**Table 2**). A non-significant trend towards a lower mortality risk was  
164 observed in the intervention group, with crude and adjusted Kaplan-Meier analysis  
165 confirming this trend ( $p=0.084$  and  $0.085$ , respectively) (**figure 2**).

## 166 **DISCUSSION**

167 HAD is a frequent condition among hospitalised older adults that has major negative  
168 consequences for patients and caregivers.<sup>1</sup> Our finding that performing simple inpatient  
169 exercises (solely walking and rising from a chair) considerably decreases (by ~70%) the  
170 risk of HAD in acutely hospitalised patients of advanced age (mean of 88 years), the  
171 majority also being frail, is thus important. Accordingly, our results support the routine  
172 implementation of these exercises during the acute hospitalisation of older patients.

173 Results of different systematic reviews indicate that inpatient exercise programmes are  
174 safe and overall effective in hospitalised older patients.<sup>11-13</sup> However, not all types of

175 exercise interventions are easily feasible in this population owing to a frequently limited  
176 mobility capacity. Walking during hospital stay has proven to maintain pre-  
177 hospitalisation mobility, but conflicting results have been reported regarding its benefits  
178 on ADL function.<sup>19,20</sup> By contrast, the combination of walking with lower limb  
179 strengthening exercises can provide greater benefits on functional ability.<sup>21,22</sup> Indeed,  
180 walking combined with stretching/strengthening exercises (*e.g.*, leg lifts/swings, toe/heel  
181 raises) is associated with a better ADL function at 1-month post-discharge.<sup>21</sup> A recent  
182 study reported that a combination of walking, balance, and resistance exercises during a  
183 median of 5 days provided significant benefits in the functional ability of older patients  
184 during acute hospitalisation.<sup>22</sup> But, the aforementioned intervention was more complex  
185 than the present protocol and required specific weight-training equipment,<sup>22</sup> which might  
186 hinder routine implementation in some ACE units.

187 Although sedentary behaviours (such as those commonly observed in hospitalised  
188 patients<sup>8</sup>) are associated with an increased incidence of frailty in older adults, the  
189 inclusion of a low amount of physical activity moderates (or even completely offsets if  
190 performed for >27 minutes) this relationship,<sup>23</sup> which reinforces the need of increasing  
191 physical activity levels regardless of the specific exercise performed. In further support  
192 of the effectiveness of simple exercises against sedentary behaviours and the consequent  
193 functional decline, Harvey et al. recently reported that encouraging frequent but small  
194 bouts of exercise (*i.e.*, rising from a chair) might suffice to reduce functional decline in  
195 frail sheltered housing residents.<sup>24</sup> It is reasonable to hypothesise that, as in healthy older  
196 adults, a dose-response relationship likely exists between training intensity and exercise  
197 benefits.<sup>25</sup> However, our results suggest that walking for up to 10 minutes and standing  
198 up from a chair (gradually increasing exercise loads by increasing the total number of  
199 repetitions [until a maximum of 30/day] and providing external help during the movement

200 if needed) might induce clinically meaningful benefits in the case of frail older patients  
201 such as those studied here. That said, this type of intervention requires close supervision  
202 and thus an additional time involvement of the hospital staff with respect to their daily  
203 duties or reliance on external staff, as described here (i.e., fitness specialists).

204 Several potential limitations should be considered. Groups initially differed in functional  
205 and mental status as well as in falls history, which might have potentially biased the  
206 outcomes. In this respect, however, the benefits of the intervention on the risk of incident  
207 HAD remained significant even after adjusting for clinical and functional variables at  
208 admission. The losses during the follow-up (up to ~20% of participants for some  
209 endpoints such as FAC) should also be borne in mind as a limitation. Also, our study is a  
210 single-centre study performed in a very old and frail population, which could limit the  
211 generalisability of our findings to younger or more functional patients. The small  
212 proportion (~25%) of the total number of hospitalised patients in our ACE unit that  
213 participated in our study possibly (partly due to the strict inclusion criteria) lends further  
214 support to the idea that the present results might not be necessarily applicable to acutely  
215 hospitalised old patients in general. On the other hand, although this intervention did not  
216 require investment in weight-training equipment, the additional time commitment needed  
217 from the hospital staff to supervise the exercise sessions (or alternatively the need to rely  
218 on external staff such as fitness specialists, as we did here) are issues that should be  
219 addressed in future research, for instance in studies aiming to assess the cost effectiveness  
220 of the present type of intervention. It must also be noted that no intervention benefits were  
221 observed when HAD was analysed with respect to baseline (i.e., 2 weeks before  
222 admission). Finally, the greater functional independence of the control group at baseline  
223 could have potentially influenced the results, as the patients of this group might have  
224 tended to more rapidly recover their “normal” physical status during hospitalisation even

225 in the absence of an exercise intervention.

## 226 **CONCLUSIONS AND IMPLICATIONS**

227 A simple inpatient exercise programme solely consisting of walking and rising from a  
228 chair (median duration of the intervention only 3 days, ~20 minutes/day) decreases the  
229 incidence of HAD in acutely hospitalised, very old patients. Further research is needed to  
230 analyse the cost-effectiveness of this type of intervention (in terms of staff resources) and  
231 its generalisability. However, given the clinical relevance of HAD, our results support the  
232 routine implementation of these exercises during the acute hospitalisation of older  
233 patients.

## 234 **CONFLICTS OF INTEREST**

235 The authors declare no conflicts of interest.

## 236 **REFERENCES**

- 237 1. Covinsky KE, Pierluissi E, Story THEPS. Hospitalization-Associated Disability  
238 “She Was Probably Able to Ambulate, but I’m Not Sure”. *JAMA*.  
239 2011;306(16):1782–1793.
- 240 2. Gill TM, Allore HG, Holford TR, Guo Z. Hospitalization, restricted activity, and  
241 the development of disability among older persons. *JAMA*. 2004;292(17):2115–  
242 2124. doi:10.1001/jama.292.17.2115
- 243 3. Gill TM, Allore HG, Gahbauer E, Murphy T. Change in disability after  
244 hospitalization or restricted activity in older persons. *JAMA*. 2010;304(17):1919–  
245 1928. doi:10.1001/jama.2010.1568.CHANGE
- 246 4. Covinsky KE, Palmer RM, Fortinsky RH, Counsell SR, Stewart AL, Kresevic D.

- 247           Loss of Independence in Activities of Daily Living in Older Adults Hospitalized  
248           with Medical Illnesses : Increased Vulnerability with Age. *J Am Geriatr Soc.*  
249           2003;51(4):451–458.
- 250    5.    Boyd C, Landefeld C, Counsell S, u. a. Recovery in Activities of Daily Living  
251           Among Older Adults Following Hospitalization for Acute Medical Illness. *J Am*  
252           *Geriatr Soc.* 2008;56(12):2171–2179. doi:10.1111/j.1532-  
253           5415.2008.02023.x.Recovery
- 254    6.    Inouye SK, Peduzzi PN, Robison JT, Hughes JS, Horwitz RI, Concato J.  
255           Importance of functional measures in predicting mortality among older  
256           hospitalized patients. *JAMA.* 1998;279(15):1187–1198.  
257           doi:10.1001/jama.279.15.1187
- 258    7.    Fortinsky RH, Covinsky KE, Palmer RM, Landefeld CS. Effects of functional  
259           status changes before and during hospitalization on nursing home admission of  
260           older adults. *Journals Gerontol - Ser A Biol Sci Med Sci.* 1999;54(10):521–526.  
261           doi:10.1093/gerona/54.10.M521
- 262    8.    Brown CJ, Redden DT, Flood KL, Allman RM. The underrecognized epidemic  
263           of low mobility during hospitalization of older adults. *J Am Geriatr Soc.*  
264           2009;57(9):1660–1665. doi:10.1111/j.1532-5415.2009.02393.x
- 265    9.    Callen BL, Mahoney JE, Grieves CB, Wells TJ, Enloe M. Frequency of hallway  
266           ambulation by hospitalized older adults on medical units of an academic hospital.  
267           *Geriatr Nurs (Minneap).* 2004;25(4):212–217.  
268           doi:10.1016/j.gerinurse.2004.06.016
- 269    10.   Valenzuela PL, Morales JS, Pareja-Galeano H, u. a. Physical strategies to prevent

- 270 disuse-induced functional decline in the elderly. *Ageing Res Rev.*  
271 2018;47(July):80–88. doi:10.1016/J.ARR.2018.07.003
- 272 11. Martínez-Velilla N, Cadore EL, Casas-Herrero, Idoate-Saralegui F, Izquierdo M.  
273 Physical activity and early rehabilitation in hospitalized elderly medical patients:  
274 Systematic review of randomized clinical trials. *J Nutr Heal Aging.*  
275 2016;20(7):738–751. doi:10.1007/s12603-016-0683-4
- 276 12. Bachmann S, Finger C, Huss A, Egger M, Stuck AE, Clough-Gorr KM. Inpatient  
277 rehabilitation specifically designed for geriatric patients: Systematic review and  
278 meta-analysis of randomised controlled trials. *BMJ.* 2010;340(7758):1230.  
279 doi:10.1136/bmj.c1718
- 280 13. Kosse NM, Dutmer AL, Dasenbrock L, Bauer JM, Lamoth CJC. Effectiveness  
281 and feasibility of early physical rehabilitation programs for geriatric hospitalized  
282 patients: A systematic review. *BMC Geriatr.* 2013;13(1). doi:10.1186/1471-  
283 2318-13-107
- 284 14. Fleck SJ, Bustamante-Ara N, Ortiz J, Vidán MT, Lucia A, Serra-Rexach JA.  
285 Activity in GERiatric acute CARE (AGECAR): Rationale, design and methods.  
286 *BMC Geriatr.* 2012;12:12–28. doi:10.1186/1471-2318-12-28
- 287 15. Vidán MT, Sánchez E, Alonso M, Montero B, Ortiz J, Serra JA. An intervention  
288 integrated into daily clinical practice reduces the incidence of delirium during  
289 hospitalization in elderly patients. *J Am Geriatr Soc.* 2009;57(11):2029–2036.  
290 doi:10.1111/j.1532-5415.2009.02485.x
- 291 16. Guralnik JM, Simonsick EM, Ferrucci L, u. a. A Short Physical performance  
292 Battery Assessing Lower Extremity Function: Association With Self-Reported



- 293           Disability and Prediction of Mortality and Nursing Home Admission. *J Gerontol*  
294           *Med Sci.* 1994;49(2):M85–M94.
- 295    17.    Holden MK, Gill KM, Magliozzi MR, Nathan J, Piehl-baker L. Clinical gait  
296           assessment in the neurologically impaired. Reliability and meaningfulness. *Phys*  
297           *Ther.* 1984;64(1):35–40. doi:10.1093/ptj/64.1.35
- 298    18.    Katz S, Ford A, Moskowitz R, Jackson B, Jaffe M. Studies of illness in the aged.  
299           The index of ADL: a standardized measure of biological and psychological  
300           function. *JAMA.* 1963;185:914–918.
- 301    19.    Brown CJ, Foley KT, Lowman JD, et al. Comparison of posthospitalization  
302           function and community mobility in hospital mobility program and usual care  
303           patients a randomized clinical trial. *JAMA Intern Med.* 2016;176(7):921–927.  
304           doi:10.1001/jamainternmed.2016.1870
- 305    20.    Padula CA, Hughes C, Baumhover L. Impact of a nurse-driven mobility protocol  
306           on functional decline in hospitalized older adults. *J Nurs Care Qual.*  
307           2009;24(4):325–331. doi:10.1097/NCQ.0b013e3181a4f79b
- 308    21.    Siebens H, Aronow H, Edwards D, Ghasemi Z. A randomized controlled trial of  
309           exercise to improve outcomes of acute hospitalization in older adults. *J Am*  
310           *Geriatr Soc.* 2000;48:1545–1546.
- 311    22.    Martínez-Velilla N, Casas-Herrero N, Zambon-Ferraresi F, et al. Effect of  
312           Exercise Intervention on Functional Decline in Very Elderly Patients During  
313           Acute Hospitalization: A Randomized Clinical Trial. *JAMA Intern Med.*  
314           2019;179(1):28–36.

- 315 23. Mañas A, Pozo-Cruz B del, Rodríguez-Gómez I, u. a. Can Physical Activity  
316 Offset the Detrimental Consequences of Sedentary Time on Frailty? A  
317 Moderation Analysis in 749 Older Adults Measured With Accelerometers. *J Am*  
318 *Med Dir Assoc.* 2019;In press. doi:10.1016/j.jamda.2018.12.012
- 319 24. Harvey JA, Chastin SFM, Skelton DA. Breaking sedentary behaviour has the  
320 potential to increase / maintain function in frail older adults. *J Frailty,*  
321 *Sarcopenia Falls.* 2018;03(01):26–34. doi:10.22540/jfsf-03-026
- 322 25. Borde R, Hortobágyi T, Granacher U. Dose–Response Relationships of  
323 Resistance Training in Healthy Old Adults: A Systematic Review and Meta-  
324 Analysis. *Sport Med.* 2015;45(12):1693–1720. doi:10.1007/s40279-015-0385-9
- 325 26. Fried LP, Tangen CM, Walston J, u. a. Frailty in Older Adults: Evidence for a  
326 Phenotype. *Journals Gerontol Ser A Biol Sci Med Sci.* 2001;56(3):M146–M157.  
327 doi:10.1093/gerona/56.3.M146
- 328 27. Bandinelli S, Lauretani F, Boscherini V, u. a. A randomized, controlled trial of  
329 disability prevention in frail older patients screened in primary care: the FRASI  
330 Study. Design and baseline evaluation. *Aging Clin Exp Res.* 2009;18(5):359–366.  
331  
332

333 **Table 1.** Baseline, admission and main in-hospital characteristics by group

| Variable                                                   | Control (N=125) | Exercise (N=143) | p-value          |
|------------------------------------------------------------|-----------------|------------------|------------------|
| <b>Age (mean ± SD), years</b>                              | 88 ± 5          | 88 ± 5           | 0.88             |
| <b>Women</b>                                               | 54%             | 60%              | 0.28             |
| <b>Body mass index (mean ± SD), kg/m<sup>2</sup></b>       | 26.0 ± 6.4      | 26.1 ± 9.3       | 0.95             |
| <b>Living at home</b>                                      | 93%             | 91%              | 0.57             |
| <b>Charlson comorbidity index (mean ± SD)</b>              | 6.8 ± 1.9       | 6.7 ± 1.7        | 0.88             |
| <b>Geriatric syndromes</b>                                 |                 |                  |                  |
| Dementia                                                   | 12%             | 27%              | <b>0.003</b>     |
| Depression                                                 | 18%             | 32%              | <b>0.010</b>     |
| Falls                                                      | 16%             | 36%              | <b>&lt;0.001</b> |
| Chronic pain                                               | 30%             | 35%              | 0.43             |
| Malnutrition                                               | 14%             | 22%              | 0.085            |
| Urinary incontinence                                       | 39%             | 49%              | 0.11             |
| Frailty phenotype <sup>a</sup>                             | 65%             | 74%              | 0.097            |
| Incident delirium                                          | 18%             | 28%              | 0.81             |
| <b>Polypharmacy (≥7)</b>                                   | 55%             | 58%              | 0.64             |
| <b>Main admission diagnosis</b>                            |                 |                  | 0.39             |
| Respiratory                                                | 26%             | 34%              |                  |
| Circulatory                                                | 30%             | 26%              |                  |
| Renal/urologic                                             | 15%             | 8%               |                  |
| Central nervous system                                     | 7%              | 13%              |                  |
| Digestive                                                  | 7%              | 8%               |                  |
| <b>Independence in basic ADLs at baseline<sup>b</sup></b>  |                 |                  |                  |
| Full function (>4 ADLs)                                    | 62%             | 50%              | <b>0.036</b>     |
| Moderate impairment (3–4 ADLs)                             | 22%             | 24%              | 0.58             |
| Severe impairment (<3 ADLs)                                | 16%             | 26%              | <b>0.049</b>     |
| <b>Independent ambulation at baseline (FAC &lt;4)</b>      | 76%             | 68%              | 0.14             |
| <b>Independence in basic ADLs at admission<sup>b</sup></b> |                 |                  |                  |
| Full function (>4 ADLs)                                    | 30%             | 18%              | <b>0.019</b>     |
| Moderate impairment (3–4 ADLs)                             | 25%             | 21%              | 0.46             |
| Severe impairment (<3 ADLs)                                | 45%             | 61%              | <b>0.009</b>     |
| <b>Independent ambulation (FAC &lt;4) at admission</b>     | 40%             | 31%              | 0.13             |
| <b>SPPB (mean ±SD), score at admission</b>                 | 3.8 ± 2.9       | 3.2 ± 2.5        | 0.078            |
| <b>Length of hospitalization (median [IQR]), days</b>      | 7 (5)           | 6 (4)            | 0.25             |

334

335 Abbreviations: ADLs, activities of daily living; FAC, functional ambulation category; IQR,  
336 interquartile range; SPPB, short physical performance battery.

337 <sup>a</sup> Frailty was defined as having ≥3 of 5 Fried's criteria.<sup>26</sup>

338 <sup>b</sup> The 6 basic ADLs assessed were bathing, dressing, transferring, toileting, continence and  
339 feeding. Significant differences between groups (p<0.05) are in bold.

**Table 2.** Effects of hospitalization on study endpoints

|                                              | Control group<br>(N=125)                                      |              | Exercise group<br>(N=143)                                     |              | Binary logistic regression/Negative<br>binomial regression <sup>d</sup> |                                                |
|----------------------------------------------|---------------------------------------------------------------|--------------|---------------------------------------------------------------|--------------|-------------------------------------------------------------------------|------------------------------------------------|
|                                              | N with<br>actual data<br>for analyses<br>for each<br>endpoint | Cases<br>(%) | N with<br>actual data<br>for analyses<br>for each<br>endpoint | Cases<br>(%) | Crude<br>(95% CI)                                                       | Adjusted <sup>e</sup><br>(95% CI)              |
| <b>At discharge</b>                          |                                                               |              |                                                               |              |                                                                         |                                                |
| <b>HAD</b> <sup>a</sup>                      | 125                                                           | 21%          | 143                                                           | 10%          | <b>OR: 0.41 (0.21, 0.83)</b><br><b>p=0.013</b>                          | <b>OR: 0.32 (0.11, 0.92)</b><br><b>p=0.035</b> |
| <b>SPPB score &lt;9</b><br><sub>b</sub>      | 115                                                           | 90%          | 134                                                           | 96%          | OR: 2.26<br>(0.81, 6.31)<br>p=0.12                                      | OR: 0.96<br>(0.16, 5.75)<br>p=0.96             |
| <b>Dependent<br/>ambulation</b> <sup>c</sup> | 125                                                           | 50%          | 143                                                           | 61%          | OR: 1.53<br>(0.94, 2.48)<br>p=0.087                                     | OR: 0.66<br>(0.28, 1.60)<br>p=0.66             |
| <b>3-months post-discharge</b>               |                                                               |              |                                                               |              |                                                                         |                                                |
| <b>HAD</b>                                   | 102                                                           | 41%          | 123                                                           | 24%          | <b>OR: 0.51 (0.27, 0.98)</b><br><b>p=0.043</b>                          | <b>OR: 0.24 (0.08, 0.74)</b><br><b>p=0.013</b> |
| <b>Dependent<br/>ambulation</b>              | 94                                                            | 45%          | 123                                                           | 58%          | OR: 1.69<br>(0.98, 2.90)<br>p=0.057                                     | OR: 0.77<br>(0.34, 1.76)<br>p=0.54             |
| <b>Re-<br/>hospitalisation</b>               | 125                                                           | 22%          | 143                                                           | 24%          | OR: 1.12<br>(0.64, 1.98)<br>p=0.69                                      | OR: 1.17<br>(0.49, 2.79)<br>p=0.72             |
| <b>Number of<br/>falls*</b>                  | 106                                                           | –            | 125                                                           | –            | IRR: 0.98<br>(0.87, 1.08)<br>p=0.678                                    | IRR: 0.98<br>(0.86, 1.14)<br>p=0.678           |
| <b>Mortality</b>                             | 125                                                           | 10%          | 143                                                           | 4%           | OR: 0.41<br>(0.15, 1.13)<br>p=0.086                                     | OR: 0.09<br>(0.01, 1.32)<br>p=0.078            |

<sup>a</sup> HAD refers to the loss of ability to perform one or more basic activities of daily living independently compared with admission

<sup>b</sup> An SPPB score <9 has been reported as an indicator of frailty.<sup>27</sup>

<sup>c</sup> Dependent ambulation was considered as a Functional Ambulation Category [FAC] <4.<sup>17</sup>

<sup>d</sup> The control group was used as reference for regression analyses; except for number of falls (analysed with negative binomial regression), binary logistic regression was used for the remainder of endpoints.

<sup>e</sup> Adjusted for sex, age, body mass index, living or not at home, Charlson index, polypharmacy (>7), comorbidities, cause of hospitalisation (admission diagnosis) and physical function at admission (including Katz score, independent ambulation or not, and having a SPPB score <9 or not).

Abbreviations: CI, confidence interval; HAD, hospitalisation-associated disability; IRR, incidence rate ratio; OR, odds ratio. Significant (p<0.05) OR values are in bold.

## FIGURE CAPTIONS

**Figure 1.** Flowchart of study participants. Abbreviations: AMI, acute myocardial infarction.

**Figure 2.** Kaplan-Meier survival analysis.

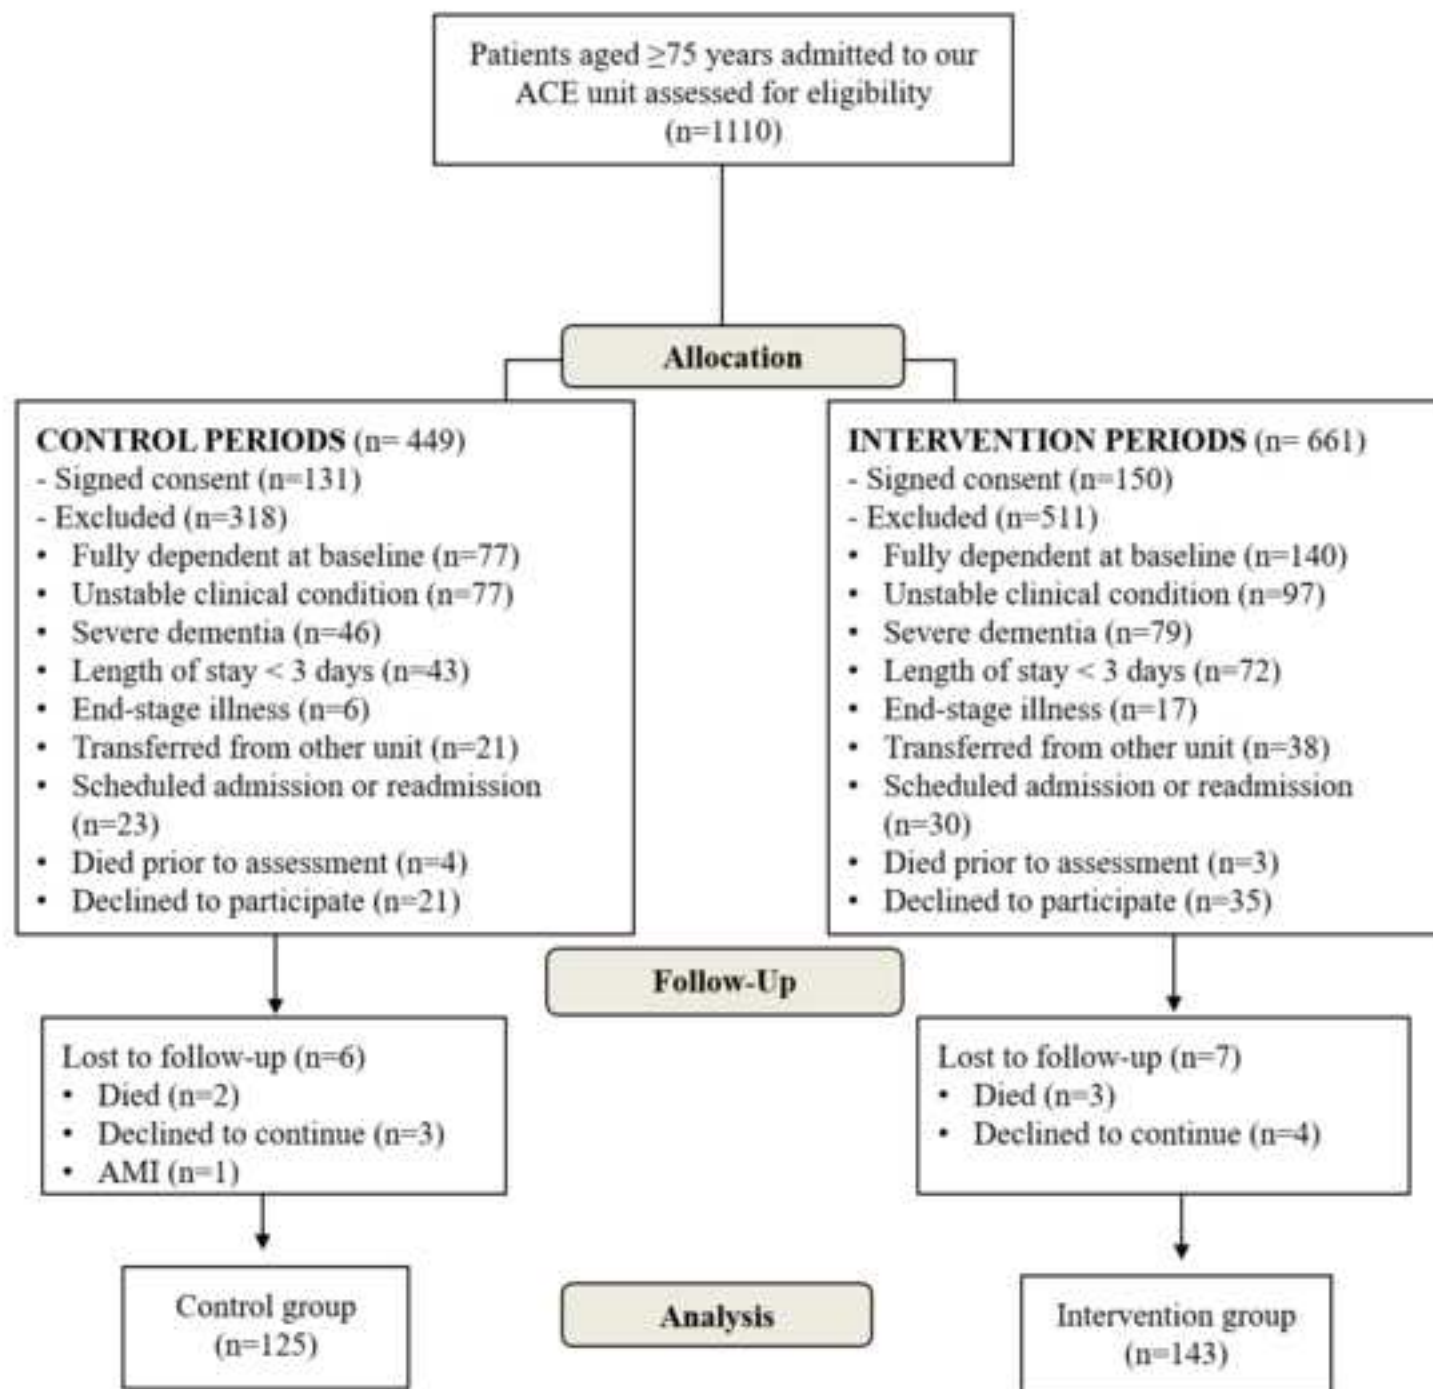

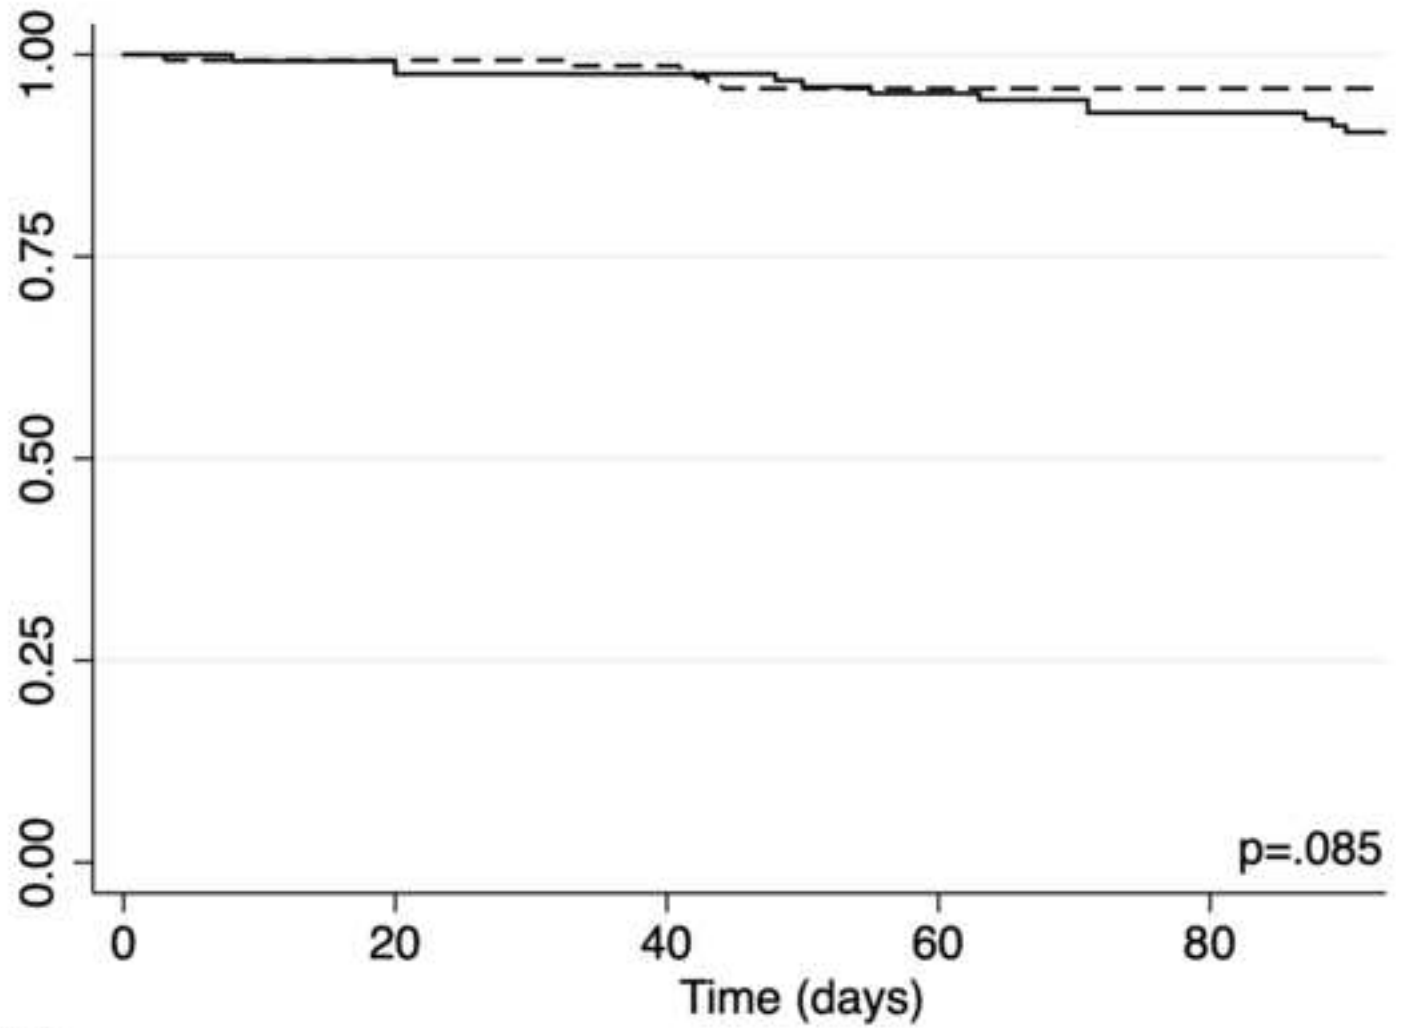

| Number at risk |                |     |     |     |     |     |
|----------------|----------------|-----|-----|-----|-----|-----|
| —              | Control Group  | 125 | 124 | 122 | 119 | 116 |
| - - -          | Exercise Group | 143 | 142 | 141 | 137 | 137 |
